# Supplementary material
Source: publisher figshare collection journal article supplement (https://rs.figshare.com/ndownloader/files/36851435)
Supplement: Supplementary file 1 [file 36851435]

## Sheet: Sheet1
Table S6: Summarized diet data from published literature. Data are percentage of total diet items recorded.
Species	Mammals	Birds	Reptiles	Amphibians	Invertebrates	Fish	Total
Agkistrodon contortrix	49.5	2.6	13.4	7.3	27.3	0	1031
Agkistrodon piscivorus	3.7	3.2	18.1	17	9	48.9	188
Atheris squamigera	85.4	12.4	1.1	1.1	0	0	89
Bitis arietans	82.6	2.8	3.7	11	0	0	109
Bitis caudalis	19.3	2.7	76	2	0	0	150
Bitis gabonica	93	5.8	1	0.1	0	0	675
Bitis nasicornis	69.8	5.9	0.6	23.8	0	0	526
Bothriechis schlegelii	11.8	11.8	29.4	47.1	0	0	17
Bothrops alternatus	100	0	0	0	0	0	139
Bothrops asper	59.4	3.1	18.8	18.8	0	0	32
Bothrops atrox	45.7	2.6	16.4	33.6	1.7	0	232
Bothrops brazili	44.1	0	14.7	23.5	17.6	0	34
Bothrops cotiara	100	0	0	0	0	0	18
Bothrops fonsecai	100	0	0	0	0	0	41
Bothrops insularis	0	83.3	2.8	8.3	5.6	0	36
Bothrops itapetiningae	43.7	1.4	19.7	25.4	9.9	0	71
Bothrops jararaca	71.1	6.7	2.2	17.8	2.2	0	45
Bothrops jararacussu	70.1	0	11.9	16.4	1.5	0	67
Bothrops leucurus	56.4	2.6	28.2	12.8	0	0	39
Bothrops matogrossensis	46.7	0	5.3	46.7	1.3	0	75
Bothrops moojeni	51	3	19.5	26	0.5	0	200
Bothrops neuwiedi	93.1	0	6.9	0	0	0	29
Bothrops pauloensis	65.5	6.9	10.3	6.9	10.3	0	29
Bothrops pubescens	58.2	7.6	13.9	17.7	2.5	0	79
Bothrops taeniatus	40.9	4.5	13.6	40.9	0	0	22
Calloselasma rhodostoma	53.9	0	38.2	7.8	0	0	102
Causus lichtensteinii	0	0	0	100	0	0	32
Causus resimus	0	0	0	100	0	0	24
Causus rhombeatus	0	0	0	100	0	0	24
Cerastes vipera	0	0	100	0	0	0	24
Cerrophidion godmani	31.4	1.8	12.5	5.5	48.7	0	271
Cerrophidion sasai	51.3	3	25.4	0.8	19.5	0	236
Crotalus adamanteus	96.7	3.3	0	0	0	0	243
Crotalus aquilus	68.7	6.1	23.9	0	1.2	0	163
Crotalus atrox	86.5	6	7.5	0	0	0	133
Crotalus catalinensis	70.7	0	29.3	0	0	0	99
Crotalus cerastes	45.9	2.5	51.6	0	0	0	640
Crotalus durissus	99.1	0	0.9	0	0	0	445
Crotalus enyo	60	0	34.7	0	5.3	0	75
Crotalus horridus	91.1	7.5	1.1	0.3	0	0	628
Crotalus intermedius	0	0	100	0	0	0	18
Crotalus lepidus	15.3	1.4	53.6	0	29.7	0	209
Crotalus mitchellii	48.8	7.3	43.9	0	0	0	41
Crotalus oreganus	89.3	1.1	9.1	0.1	0.4	0	935
Crotalus polystictus	84.6	5.9	8.4	0	1	0	286
Crotalus pricei	20.7	3.7	75.6	0	0	0	82
Crotalus ravus	41.7	0	12.5	45.8	0	0	24
Crotalus ruber	91.6	0.9	7.5	0	0	0	227
Crotalus scutulatus	76.8	0	18.3	0	4.9	0	82
Crotalus tigris	55.6	6.1	38.4	0	0	0	99
Crotalus triseriatus	25.9	0.7	27.4	2.2	43.7	0	135
Crotalus viridis	93.5	5.4	1.1	0	0	0	93
Crotalus willardi	24.2	13.6	47.5	0	14.6	0	198
Echis carinatus	21.8	0.9	7.6	2.8	66.8	0	211
Echis coloratus	55.9	0	14.7	20.6	8.8	0	34
Echis ocellatus	51.4	0	5.7	0	42.9	0	35
Echis pyramidum	33.3	0	3.5	3.5	59.6	0	57
Gloydius blomhoffii	9	0	5.5	73.4	7	5	199
Lachesis muta	100	0	0	0	0	0	21
Ophryacus undulatus	86.7	0	13.3	0	0	0	15
Ovophis okinavensis	1.3	1.3	1	96.5	0	0	314
Porthidium yucatanicum	26.7	6.7	66.7	0	0	0	15
Protobothrops mucrosquamatus	72.9	3.4	8.5	15.3	0	0	59
Sistrurus catenatus	70.2	1	25.3	0.2	3.2	0	931
Sistrurus miliarius	15.5	0	39.7	29.3	15.5	0	116
Trimeresurus stejnegeri	3.7	0	9	87.3	0	0	134
Vipera ammodytes	55	10	35	0	0	0	80
Vipera aspis	85.5	0.4	13.3	0.8	0	0	255
Vipera berus	88.1	7.5	4.5	0	0	0	65
Vipera latastei	73.8	4.4	17.7	2	2	0	248
Vipera ursinii	5.6	1.2	4.8	0	88.4	0	250
